# Supplementary material for: Epigenetic alterations leading to TMPRSS4 promoter hypomethylation and protein overexpression predict poor prognosis in squamous lung cancer patients
Source: PubMed Central journal article supplement (PMC5008398; doi:10.18632/oncotarget.8045), 2016-03-14
Supplement: oncotarget-07-22752-s001.pdf [file oncotarget-07-22752-s001.pdf]

## SUPPLEMENTARY MATERIALS AND METHODS

### Immunohistochemistry for TMPRSS4

For immunostaining, slides were deparaffinized and rehydrated. Endogenous peroxidase was blocked with a 3% hydrogen peroxide solution and antigen retrieval was carried out by heating the samples in a microwave oven using citrate buffer (10 mM, pH 6). Tissues were then incubated overnight at 4°C with anti-TMPRSS4 antibody (1:500 Ingenasa Inc, Madrid, Spain). Detection of primary antibody was performed with the Advance™ HRP system (Dako, Denmark) and peroxidase activity was developed with diaminobenzidine (Dako). Finally, slides were counterstained with haematoxylin, dehydrated and coverslipped with DPX mounting medium (VWR, Soulbury, UK).

### DNA isolation

Briefly, samples were deparaffinized for 20 min at 60°C; immediately after, sections were immersed in xylene

and absolute ethanol in consecutive steps and DNA was extracted according to the manufacturer's instructions. In the case of cell lines, NucleoSpin Tissue® kit (Macherey-Nagel) was used to extract DNA from frozen pellets. DNA concentrations were measured with Quant-it Picogreen dsDNA Assay Kit (Life Technologies).

### RNA isolation and real time PCR

Purified RNA was obtained from frozen pellets with the Nucleospin RNA extraction kit (Macherey-Nagel) following manufacturer's instructions and reverse transcription was performed with PrimeScript kit (Takara). SYBR Green was used to carry out real time PCR and GAPDH was used as housekeeping gene.

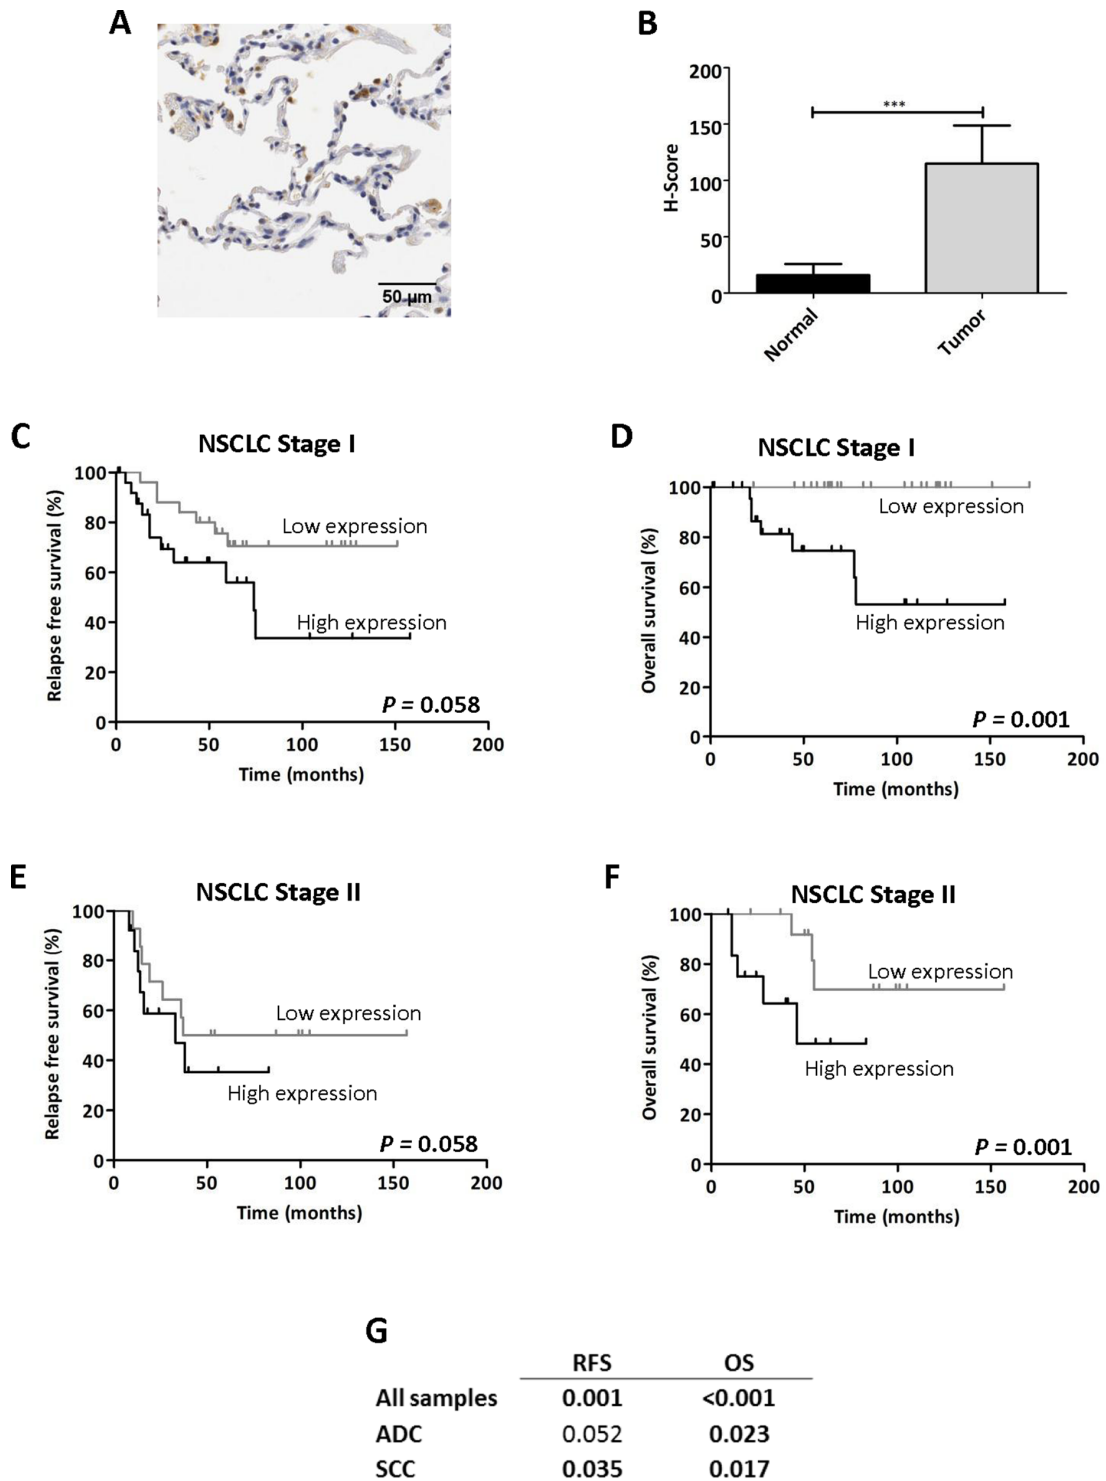

**Supplementary Figure S1:** **A.** Representative image of non-malignant lung parenchyma immunostained with anti-TMPRSS4 antibody. Labeling is observed in some type II pneumocytes. **B.** Comparison of the H-score between non-malignant and tumor samples. **C-D.** Kaplan-Meier curves for stage I NSCLC patients (n=52) according to high or low TMPRSS4 protein expression. A significant reduction in OS is observed in patients with high TMPRSS4 (D). No statistical significance is reached in the case of RFS (C). **E-F.** Kaplan-Meier curves show similar results for stage II patients (n=27), regarding RFS (E) and OS (F). **G.** P-values corresponding to logRank tests after excluding patients that were treated with adjuvant chemotherapy/radiotherapy. Statistical differences show significant association between high TMPRSS4 levels and reduced RFS and OS. \*\*\*: p<0.001.

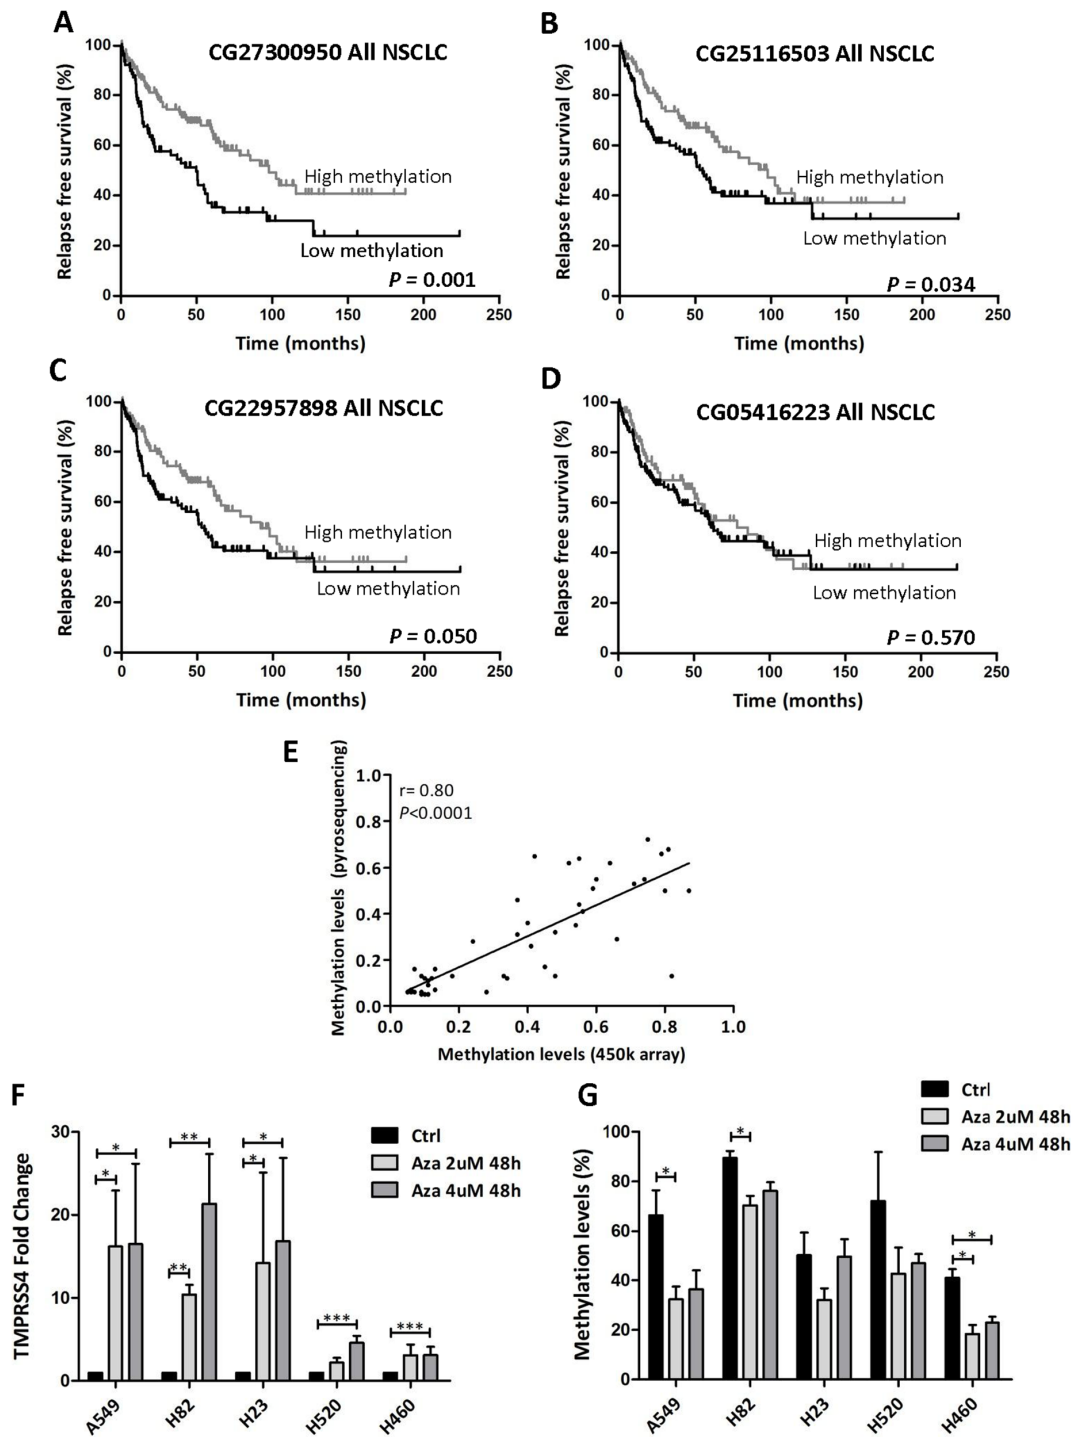

**Supplementary Figure S2: A-D.** RFS Kaplan-Meier curves for all NSCLC patients according to promoter methylation status for probes CG27300950 (A), CG25116503 (B), CG22957898 (C) and CG5416223 (D). **E.** A significant positive correlation is found between methylation status analyzed by pyrosequencing for probes CpGs -116 bp (CG03634928) and -99 bp (CG27300950) (average value of both CpGs) and methylation status from the 450K array. Pearson's correlation:  $r = 0.80$ ,  $p < 0.0001$ . **F.** Overexpression of TMPRSS4 upon treatment with the demethylating agent 5-aza-2'-deoxycytidine (Aza) in lung cancer cells with low TMPRSS4 expression. Exposure to either 2 or 4  $\mu$ M 5-aza-2'-deoxycytidine after 48h caused increased expression of TMPRSS4 in all the cells tested. **G.** Average values of methylation, obtained by pyrosequencing, in CpG sites -116 bp and -99 bp after treatment with Aza, showed decreased methylation levels in TMPRSS4.

Supplementary Table S1: Clinical and pathological characteristics of the patients

|                       | TMA Cohort<br>(n=79) | Validation Cohort<br>(n=88) |
|-----------------------|----------------------|-----------------------------|
|                       | n (%)                | n (%)                       |
| Age (median ± SD)     | 65±10.1              | 65±8.5                      |
| <b>Gender</b>         |                      |                             |
| Female                | 12 (15.2)            | 13 (14.8)                   |
| Male                  | 67 (84.8)            | 75 (85.2)                   |
| <b>Smoking status</b> |                      |                             |
| Never smoker          | 8 (10.1)             | 9 (10.2)                    |
| Former smoker         | 53 (67.1)            | 57 (64.8)                   |
| Current smoker        | 18 (22.8)            | 22 (25.0)                   |
| <b>Histology</b>      |                      |                             |
| ADC                   | 39 (49.4)            | 28 (31.8)                   |
| SCC                   | 33 (41.8)            | 52 (59.1)                   |
| Others                | 7 (8.9)              | 8 (9.1)                     |
| <b>Stage</b>          |                      |                             |
| I                     | 52 (65.8)            | 47 (53.4)                   |
| II                    | 27 (34.2)            | 28 (31.8)                   |
| III                   |                      | 11 (12.5)                   |
| IV                    |                      | 1 (1.1)                     |
| Missing               |                      | 1 (1.1)                     |
| <b>Grade</b>          |                      |                             |
| Well                  | 9 (11.4)             | 8 (9.1)                     |
| Moderately            | 33 (41.8)            | 42 (47.7)                   |
| Poorly                | 30 (38.0)            | 35 (39.8)                   |
| Missing               | 7 (8.9)              | 3 (3.4)                     |
| <b>pT</b>             |                      |                             |
| T1                    | 31 (39.2)            | 37 (42.0)                   |
| T2                    | 43 (54.4)            | 39 (44.3)                   |
| T3                    | 5 (6.3)              | 10 (11.4)                   |
| T4                    |                      | 1 (1.1)                     |
| Missing               |                      | 1 (1.1)                     |
| <b>pN</b>             |                      |                             |
| N0                    | 65 (82.3)            | 64 (72.7)                   |
| N1                    | 14 (17.7)            | 16 (18.2)                   |
| N2                    |                      | 7 (8.0)                     |
| Missing               |                      | 1 (1.1)                     |

pN = pathological N stage; pT = pathological T stage.

Supplementary Table S2: Relationship between TMPRSS4 expression and clinicopathological characteristics of NSCLC patients

|                       | NSCLC (n=79) |           |              | ADC (n=39) |           |          | SCC (n=33) |           |          |
|-----------------------|--------------|-----------|--------------|------------|-----------|----------|------------|-----------|----------|
|                       | n (%)        | n (%)     | <i>P</i>     | n (%)      | n (%)     | <i>P</i> | n (%)      | n (%)     | <i>P</i> |
|                       | Low          | High      |              | Low        | High      |          | Low        | High      |          |
| <b>Age</b>            |              |           |              |            |           |          |            |           |          |
| ≤65                   | 24 (57.1)    | 18 (42.9) | 0.141        | 16 (69.6)  | 7 (30.4)  | 0.394    | 8 (50.0)   | 8 (50.0)  | 0.226    |
| >65                   | 15 (40.5)    | 22 (59.5) |              | 9 (56.3)   | 7 (43.8)  |          | 5 (29.4)   | 12 (70.6) |          |
| <b>Gender</b>         |              |           |              |            |           |          |            |           |          |
| Female                | 7 (58.3)     | 5 (41.7)  | 0.500        | 6 (66.7)   | 3 (33.3)  | 0.855    | 1 (50.0)   | 1 (50.0)  | 0.751    |
| Male                  | 32 (47.8)    | 35 (52.2) |              | 19 (63.3)  | 11 (36.7) |          | 12 (38.7)  | 19 (61.3) |          |
| <b>Smoking status</b> |              |           |              |            |           |          |            |           |          |
| Never smoker          | 4 (50.0)     | 4 (50.0)  | 0.292        | 4 (57.1)   | 3 (42.9)  | 0.392    | 9 (42.9)   | 12 (57.1) | 0.590    |
| Former smoker         | 29 (54.7)    | 24 (45.3) |              | 19 (70.4)  | 8 (29.6)  |          | 9 (42.9)   | 12 (57.1) |          |
| Current smoker        | 6 (33.3)     | 12 (66.7) |              | 2 (40.0)   | 3 (60.0)  |          | 4 (33.3)   | 8 (66.7)  |          |
| <b>Histology</b>      |              |           |              |            |           |          |            |           |          |
| ADC                   | 25 (64.1)    | 14 (35.9) | <b>0.017</b> |            |           |          |            |           |          |
| SCC                   | 13 (39.4)    | 20 (60.6) |              |            |           |          |            |           |          |
| Others                | 1 (14.3)     | 6 (85.7)  |              |            |           |          |            |           |          |
| <b>Stage</b>          |              |           |              |            |           |          |            |           |          |
| I                     | 25 (48.1)    | 27 (51.9) | 0.750        | 15 (62.5)  | 9 (37.5)  | 0.792    | 10 (40.0)  | 15 (60.0) | 0.900    |
| II                    | 14 (51.9)    | 13 (48.1) |              | 10 (66.7)  | 5 (33.3)  |          | 3 (37.5)   | 5 (62.5)  |          |
| <b>Grade</b>          |              |           |              |            |           |          |            |           |          |
| WD/MD                 | 21 (50.0)    | 21 (50.0) | 0.576        | 14 (66.7)  | 7 (33.3)  | 0.455    | 7 (36.8)   | 12 (63.2) | 0.727    |
| PD                    | 13 (43.3)    | 17 (56.7) |              | 7 (53.8)   | 6 (46.2)  |          | 6 (42.9)   | 8 (57.1)  |          |
| <b>pT</b>             |              |           |              |            |           |          |            |           |          |
| T1                    | 17 (54.8)    | 14 (45.2) | 0.434        | 13 (81.3)  | 3 (18.8)  | 0.063    | 4 (28.6)   | 10 (71.4) | 0.275    |
| T2/T3                 | 22 (45.8)    | 26 (54.2) |              | 12 (52.2)  | 11 (47.8) |          | 9 (47.4)   | 10 (52.6) |          |
| <b>pN</b>             |              |           |              |            |           |          |            |           |          |
| N0                    | 32 (49.2)    | 33 (50.8) | 0.958        | 20 (64.5)  | 11 (35.5) | 0.916    | 12 (41.4)  | 17 (58.6) | 0.530    |
| N1                    | 7 (50.0)     | 7 (50.0)  |              | 5 (62.5)   | 3 (37.5)  |          | 1 (25.0)   | 3 (75.0)  |          |

WD = well differentiated; MD = moderately differentiated; PD = poorly differentiated.

Supplementary Table S3: Cell lines and their corresponding histological type used in the study

| Cell line | Type                 | Cell line | Type                    |
|-----------|----------------------|-----------|-------------------------|
| COR-L88   | Small cell carcinoma | H2009     | Adenocarcinoma          |
| H1436     | Small cell carcinoma | H2087     | Adenocarcinoma          |
| H187      | Small cell carcinoma | H2126     | Adenocarcinoma          |
| H209      | Small cell carcinoma | H2228     | Adenocarcinoma          |
| H345      | Small cell carcinoma | H23       | Adenocarcinoma          |
| H446      | Small cell carcinoma | H322      | Adenocarcinoma          |
| H510      | Small cell carcinoma | H358      | Adenocarcinoma          |
| H69       | Small cell carcinoma | H441      | Adenocarcinoma          |
| H82       | Small cell carcinoma | H650      | Adenocarcinoma          |
| N417      | Small cell carcinoma | HCC-44    | Adenocarcinoma          |
| 103H      | Large cell carcinoma | HCC-827   | Adenocarcinoma          |
| 97TM1     | Large cell carcinoma | LXF-289   | Adenocarcinoma          |
| H1299     | Large cell carcinoma | PC-14     | Adenocarcinoma          |
| H460      | Large cell carcinoma | H1703     | Squamous cell carcinoma |
| H661      | Large cell carcinoma | H1869     | Squamous cell carcinoma |
| A549      | Adenocarcinoma       | H2170     | Squamous cell carcinoma |
| H1395     | Adenocarcinoma       | H226      | Squamous cell carcinoma |
| H1437     | Adenocarcinoma       | H520      | Squamous cell carcinoma |
| H1568     | Adenocarcinoma       | HCC-15    | Squamous cell carcinoma |
| H1648     | Adenocarcinoma       | NH91      | Squamous cell carcinoma |
| H1650     | Adenocarcinoma       | SW900     | Squamous cell carcinoma |
| H1792     | Adenocarcinoma       | HCC-366   | Adenosquamous           |
| H1975     | Adenocarcinoma       | H727      | Carcinoid               |

Supplementary Table 4: Primers used in this study

| Primers                             | Sequence                        |
|-------------------------------------|---------------------------------|
| <b>Real time RT-PCR</b>             |                                 |
| TMPRSS4 forward                     | GGTCAGCATCCAGTACGACA            |
| TMPRSS4 reverse                     | GCACCTTCCAGTTGAACACA            |
| GADPH forward                       | ACTTTGTCAAGCTCATTTC             |
| GADPH reverse                       | CACAGGGTACTTTATTGATG            |
| <b>Bisulfite genomic sequencing</b> |                                 |
| TMPRSS4 forward                     | GTATTTAGAAGGTAGGGGGAGG          |
| TMPRSS4 reverse                     | CAACAAATCAAAAATCCCTAATC         |
| <b>Pyrosequencing</b>               |                                 |
| TMPRSS4 forward                     | AGTTAATATTTAGTTGGGTGGAAGT       |
| TMPRSS4 reverse                     | [Btn]AAACAACCCTACAAATAAAATTACCA |
| TMPRSS4 sequence                    | GTTGGGTGGAAGTTATTTA             |

[Btn] = biotinylated.
